# Supplementary material for: Preclinical Bioavailability Assessment of a Poorly Water-Soluble Drug, HGR4113, Using a Stable Isotope Tracer
Source: MDPI journal article supplement (doi:10.3390/pharmaceutics15061684), 2023-06-08
Supplement: s1 [file s1]

# Assessment of the bioavailability of a poorly water-soluble drug, HGR4113 using a stable isotope tracer for preclinical drug development

Eun Ji Ha<sup>1,†</sup>, Jeong In Seo<sup>1,†</sup>, Shaheed Ur Rehman<sup>2</sup>, Hyung Soon Park<sup>3</sup>, Sang-Ku Yoo<sup>3</sup>, Hye Hyun

Yoo<sup>1,\*</sup>

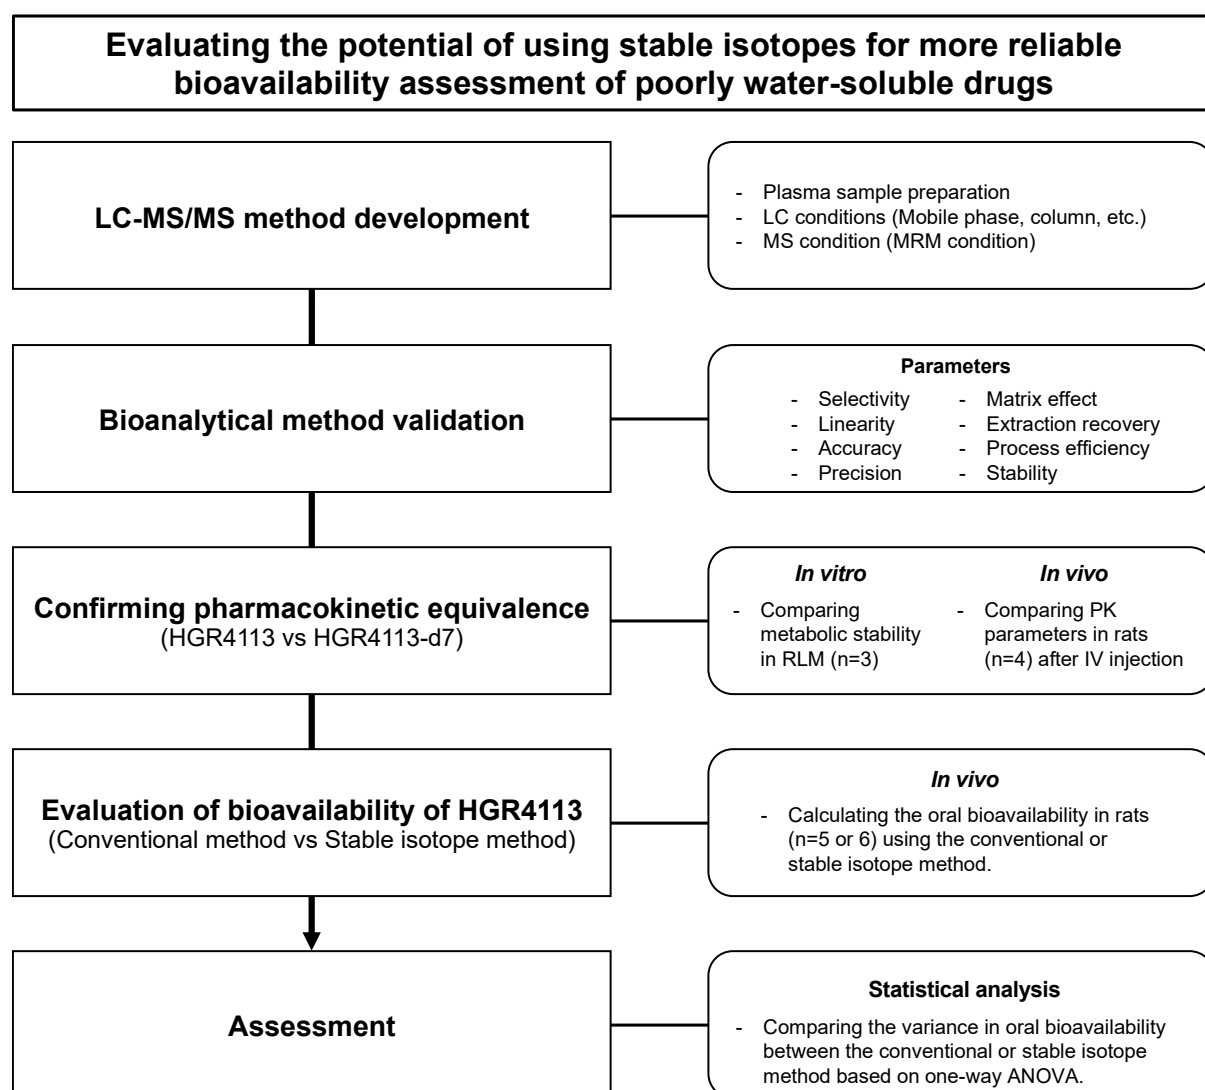

Figure S1. Study flow chart

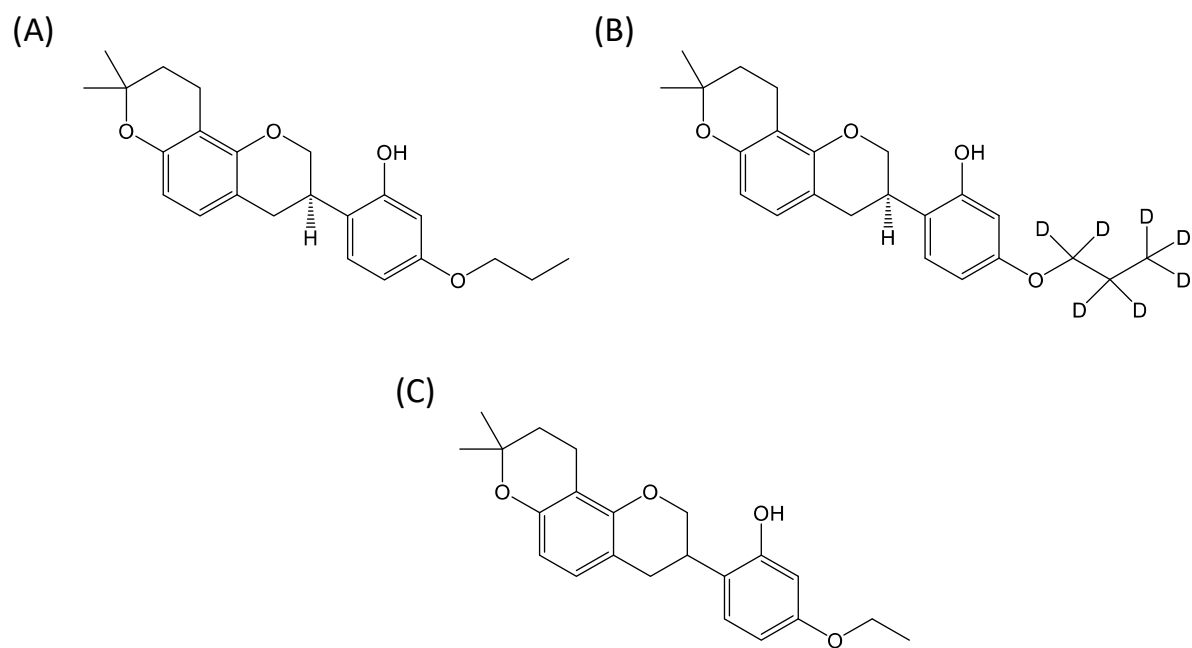

Figure S2. Chemical structures of (A) HGR4113, (B) HGR4113-d7 and (C) HSG4112 (IS)

Table S1. Results of HGR4113 and HGR4113-d7 linearity in rat plasma (n=3)

| Compound   | Nominal concentration (ng/mL) | Measured concentration (ng/mL) | Regression equation                  | Accuracy (%) | Precision (%) |
|------------|-------------------------------|--------------------------------|--------------------------------------|--------------|---------------|
| HGR4113    | 10                            | 10.3±0.2                       | m*=0.0014<br>±0.0000                 | 102.7        | 1.7           |
|            | 20                            | 19.3±1.1                       |                                      | 96.3         | 4.8           |
|            | 50                            | 46.5±5.9                       |                                      | 93.1         | 10.3          |
|            | 100                           | 102.6±3.2                      | b**=-0.0024<br>±0.0023               | 102.6        | 2.5           |
|            | 250                           | 253.7±11.3                     |                                      | 101.5        | 3.7           |
|            | 500                           | 548.6±12.0                     |                                      | 109.7        | 1.8           |
|            | 1000                          | 1082.9±36.6                    | R <sup>2***</sup> =0.9917<br>±0.0001 | 108.3        | 2.8           |
|            | 4000                          | 3709.8±109.1                   |                                      | 92.7         | 2.5           |
|            | 8000                          | 7452.7±562.6                   |                                      | 93.2         | 6.2           |
| HGR4113-d7 | 5                             | 5.1±0.2                        | m*=0.0015<br>±0.0001                 | 101.3        | 4.1           |
|            | 10                            | 10.1±0.8                       |                                      | 100.7        | 7.8           |
|            | 25                            | 23.5±0.6                       |                                      | 93.9         | 2.5           |
|            | 50                            | 48.8±1.6                       | b**=-0.0026<br>±0.0011               | 97.6         | 3.3           |
|            | 100                           | 101.9±4.8                      |                                      | 101.9        | 4.7           |
|            | 250                           | 267.4±7.9                      |                                      | 107.0        | 3.0           |
|            | 500                           | 534.1±5.9                      | R <sup>2***</sup> =0.9934<br>±0.0012 | 106.8        | 1.1           |
|            | 1000                          | 914.4±20.3                     |                                      | 91.4         | 2.2           |

\*: m=slope, \*\*: b=y-intercept, \*\*\*: R<sup>2</sup>=linear regression coefficient

Table S2. Stability for HGR4113 and HGR4113-d7 in rat plasma (n=3)

| Compound   | Storage condition | Nominal concentration<br>n<br>(ng/mL) | Measured concentration<br>n<br>(ng/mL) | Accuracy (%) | CV (%) |
|------------|-------------------|---------------------------------------|----------------------------------------|--------------|--------|
| HGR4113    | Freeze and thaw   | 30                                    | 29.5±1.7                               | 98.4         | 5.9    |
|            |                   | 6000                                  | 5920.9±276.7                           | 98.7         | 4.7    |
|            | Short term        | 30                                    | 30.8±3.3                               | 102.8        | 10.8   |
|            |                   | 6000                                  | 5444.3±140.2                           | 90.7         | 2.6    |
|            | Long term         | 30                                    | 30.4±0.8                               | 101.3        | 2.6    |
|            |                   | 6000                                  | 6122.5±160.1                           | 102.0        | 2.6    |
|            | Processed sample  | 30                                    | 27.5±0.9                               | 91.7         | 3.3    |
|            |                   | 6000                                  | 6102.2±171.7                           | 101.7        | 2.8    |
| HGR4113-d7 | Freeze and thaw   | 15                                    | 14.7±1.0                               | 97.8         | 6.6    |
|            |                   | 800                                   | 901.3±8.3                              | 112.7        | 0.9    |
|            | Short term        | 15                                    | 13.5±0.3                               | 90.2         | 2.4    |
|            |                   | 800                                   | 886.4±3.4                              | 110.8        | 0.4    |
|            | Long term         | 15                                    | 14.6±1.1                               | 97.1         | 7.8    |
|            |                   | 800                                   | 845.5±24.6                             | 105.7        | 2.9    |
|            | Processed sample  | 15                                    | 14.8±0.7                               | 98.7         | 4.8    |
|            |                   | 800                                   | 896.8±22.3                             | 112.1        | 2.5    |

*Supplementary data*

Table S3. Pharmacokinetic parameters of HGR4113 after IV administration of 1 mg/kg (n=5) and PO administration of 10, 30 and 100 mg/kg (n=5)

| PK Parameter                       | IV 1 mg/kg | PO 10 mg/kg | PO 30 mg/kg | PO 100 mg/kg |
|------------------------------------|------------|-------------|-------------|--------------|
| <b>T<sub>max</sub> (h)</b>         | 0.12±0.07  | 2.21±1.59   | 3.60±1.50   | 4.40±0.80    |
| <b>C<sub>max</sub> (µg/mL)</b>     | 0.13±0.02  | 0.08±0.04   | 0.56±0.27   | 2.27±0.55    |
| <b>AUC<sub>0-t</sub> (µg·h/mL)</b> | 0.26±0.04  | 0.36±0.16   | 3.00±1.70   | 22.38±6.36   |
| <b>T<sub>1/2</sub> (h)</b>         | 2.08±0.88  | 4.37±1.55   | 2.63±1.14   | 6.04±1.33    |
| <b>AUC<sub>0-∞</sub> (µg·h/mL)</b> | 0.28±0.03  | 0.42±0.16   | 3.03±1.70   | 24.67±7.21   |
| <b>MRT<sub>last</sub> (h)</b>      | 2.08±0.24  | 3.99±0.65   | 4.74±1.03   | 7.96±0.97    |
| <b>Cl (L/hr/kg)</b>                | 3.63±0.42  |             |             |              |
| <b>V<sub>z</sub> (L/kg)</b>        | 11.9±5.74  |             |             |              |
| <b>F (%)</b>                       |            | 13.64       | 37.96       | 84.99        |
